# Supplementary material (part 2 of 2)
Source: ML conference proceedings conference paper supplement (https://openreview.net/forum?id=HluKULi5xq)

# Accuracy-budget Curve of Ex8a Dataset with batch size 5

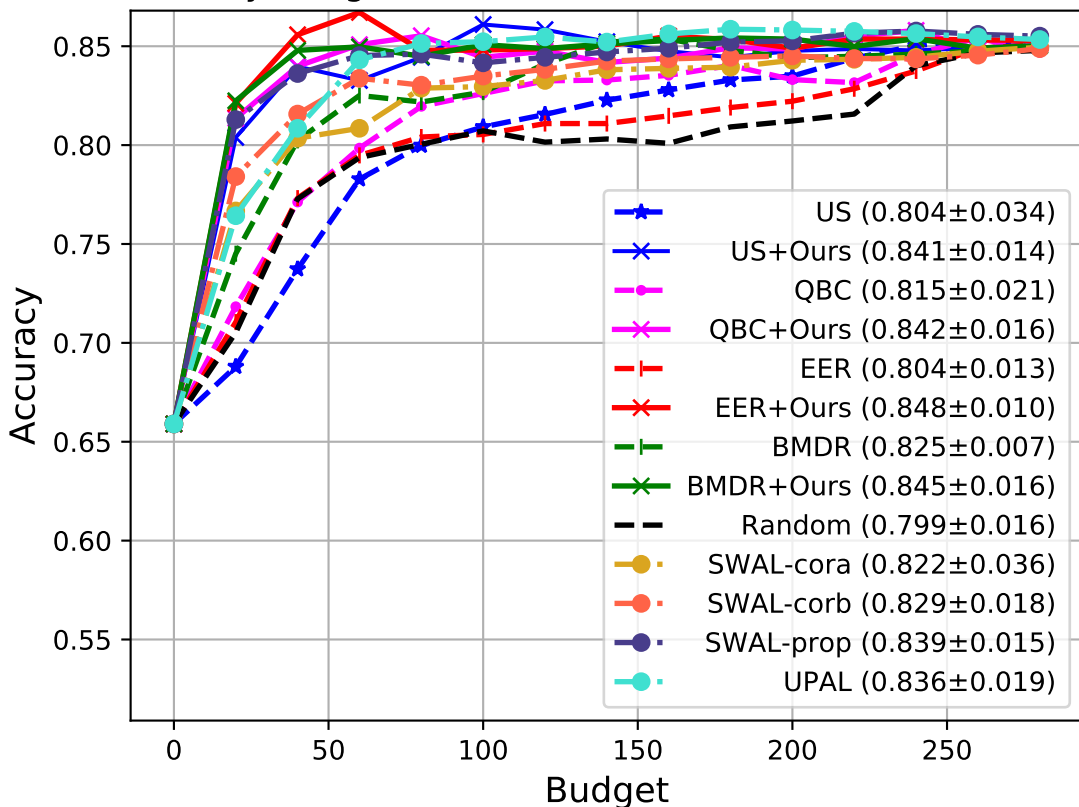

Supplement: supplementary_material [file attachment]

AUC-budget Curve of Tic-tac-toe Dataset with batch size 1

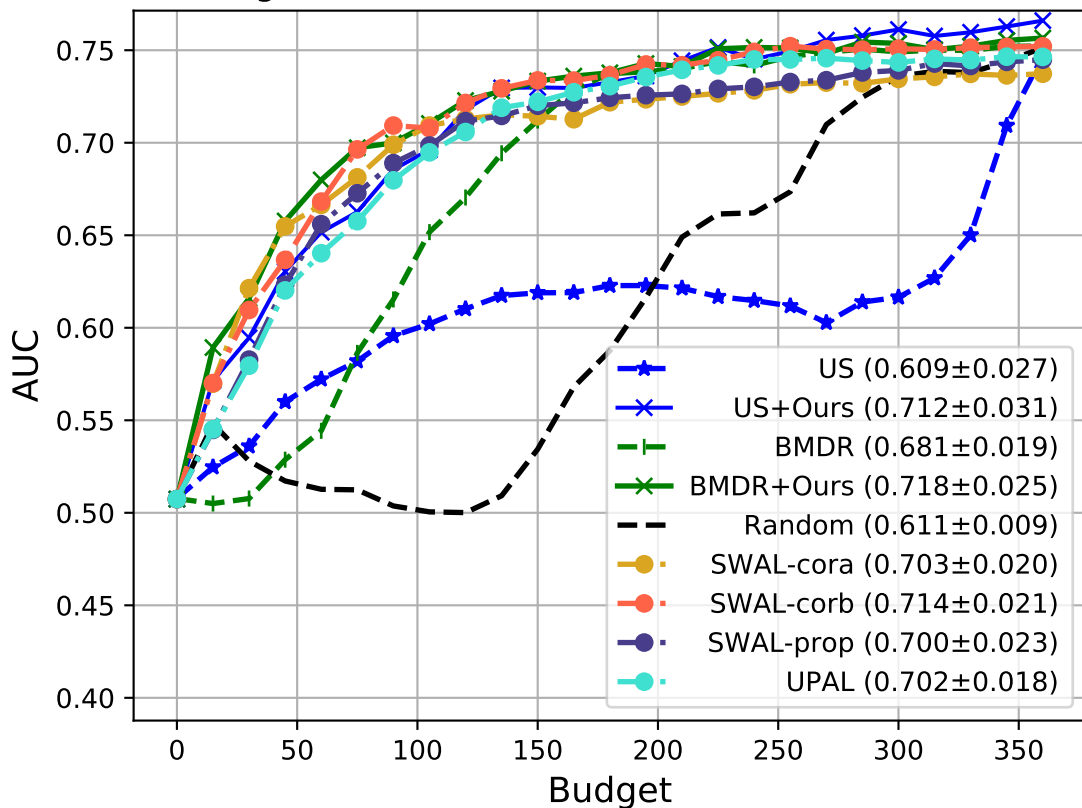

Supplement: supplementary_material [file attachment]

Accuracy-budget Curve of Ex8a Dataset with batch size 10

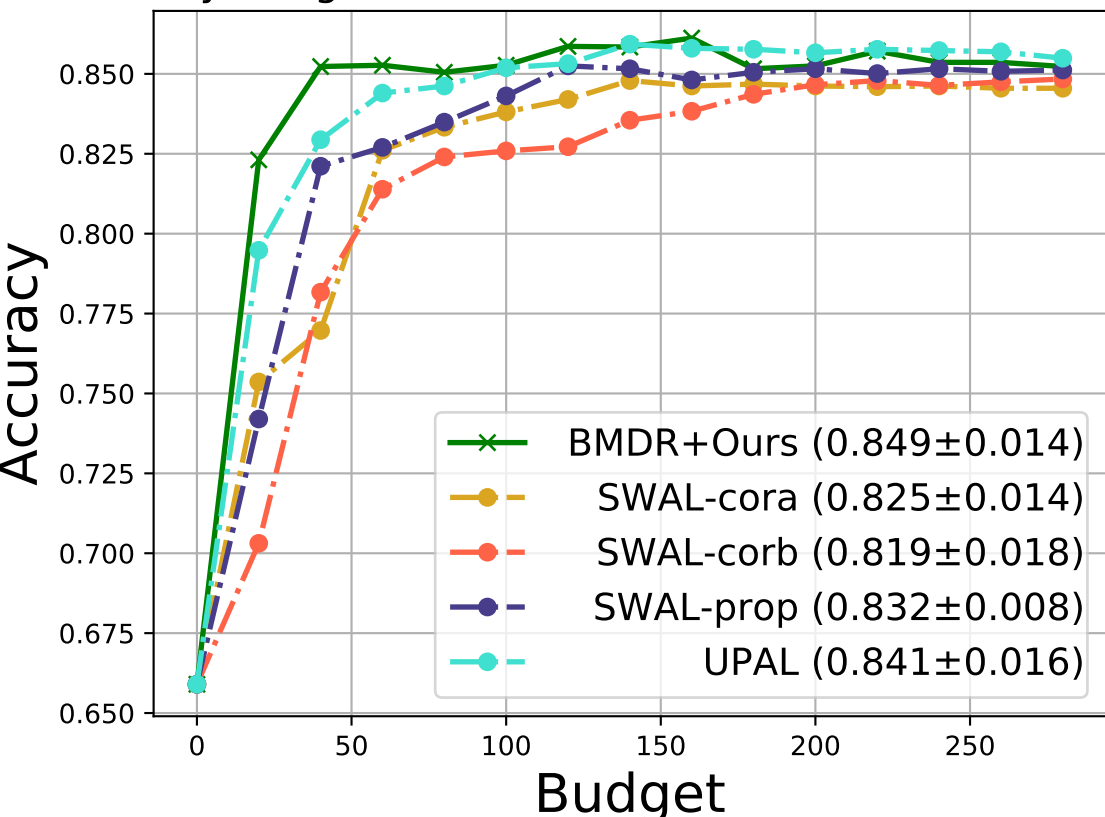

Supplement: supplementary_material [file attachment]

Accuracy-budget Curve of R15 Dataset with batch size 10

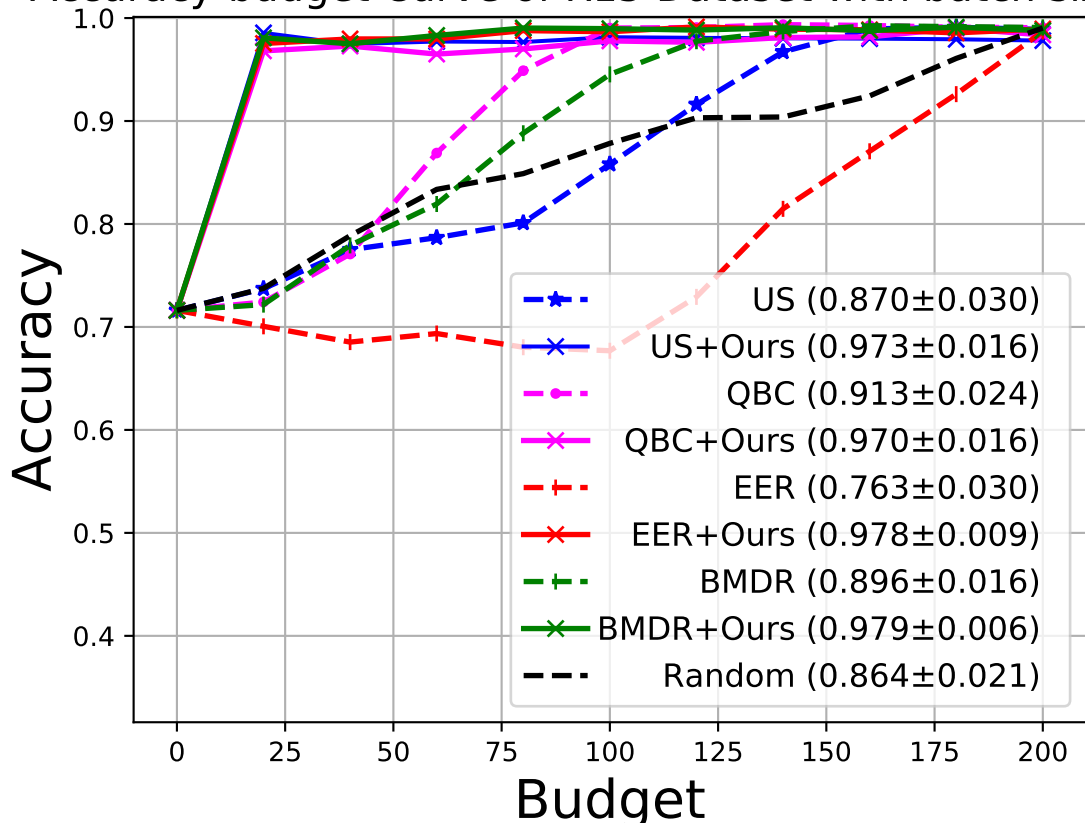

Supplement: supplementary_material [file attachment]

Accuracy-budget Curve of Tic-tac-toe Dataset with batch size 20

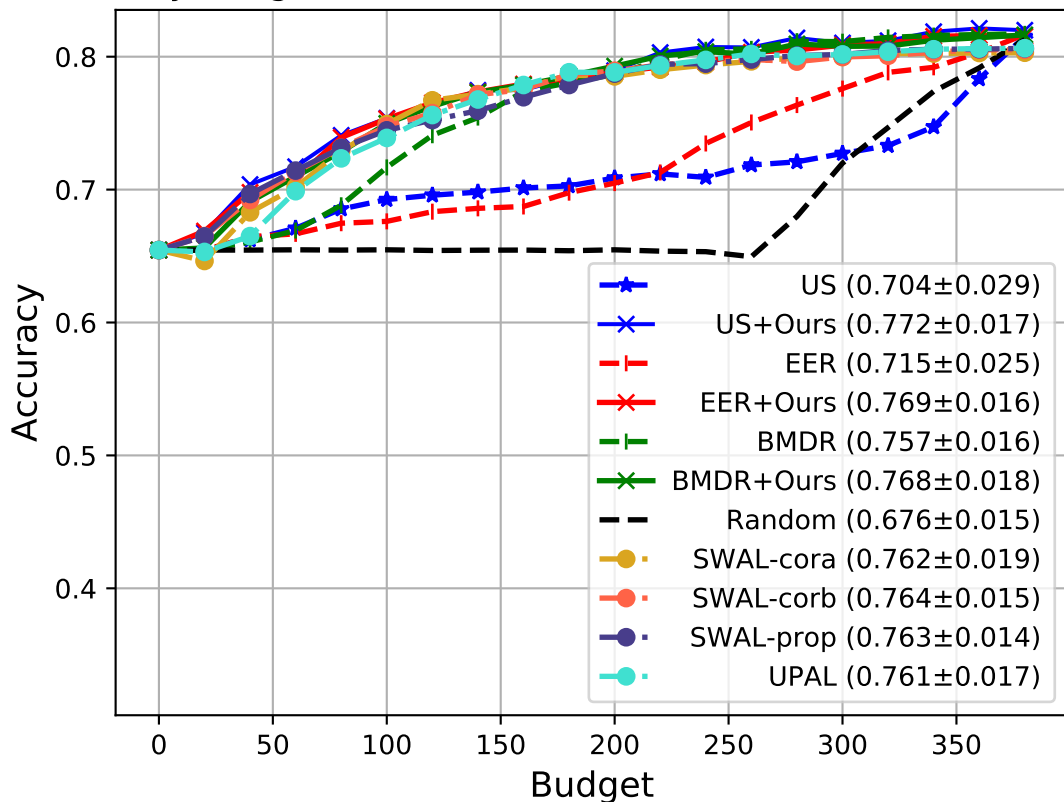

Supplement: supplementary_material [file attachment]

# Accuracy-budget Curve of Tic-tac-toe Dataset with batch size 5

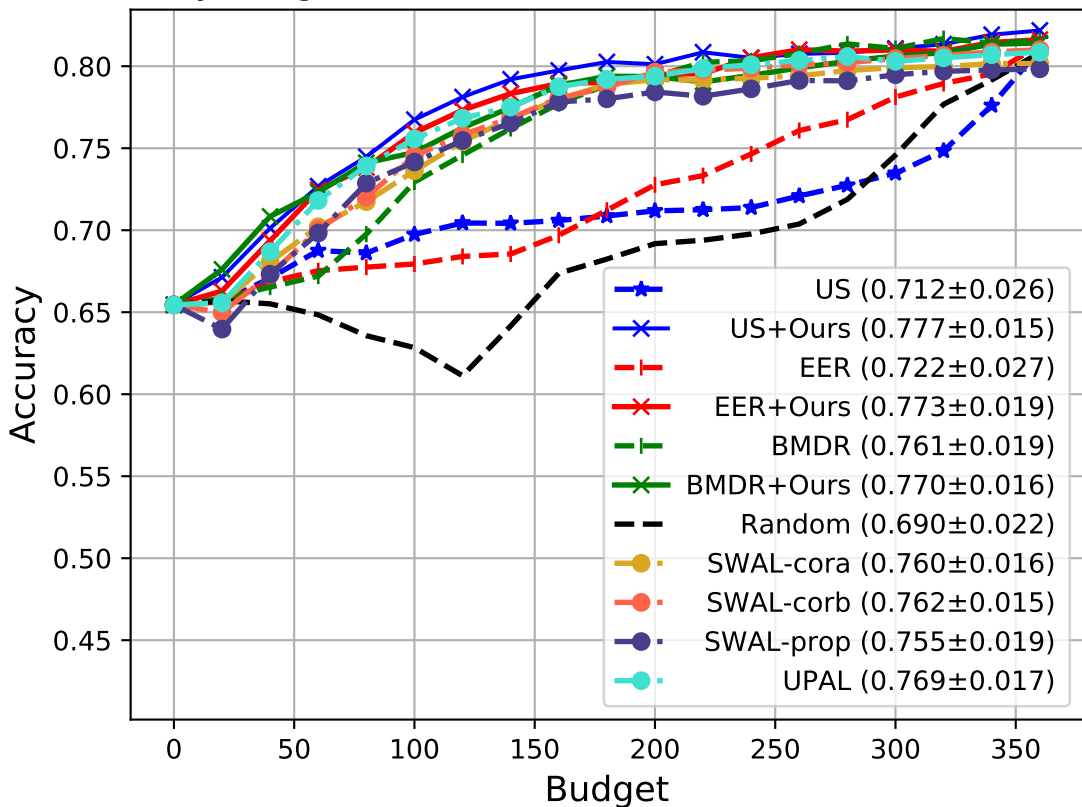

Supplement: supplementary_material [file attachment]

Accuracy-budget Curve of D31 Dataset with batch size 5

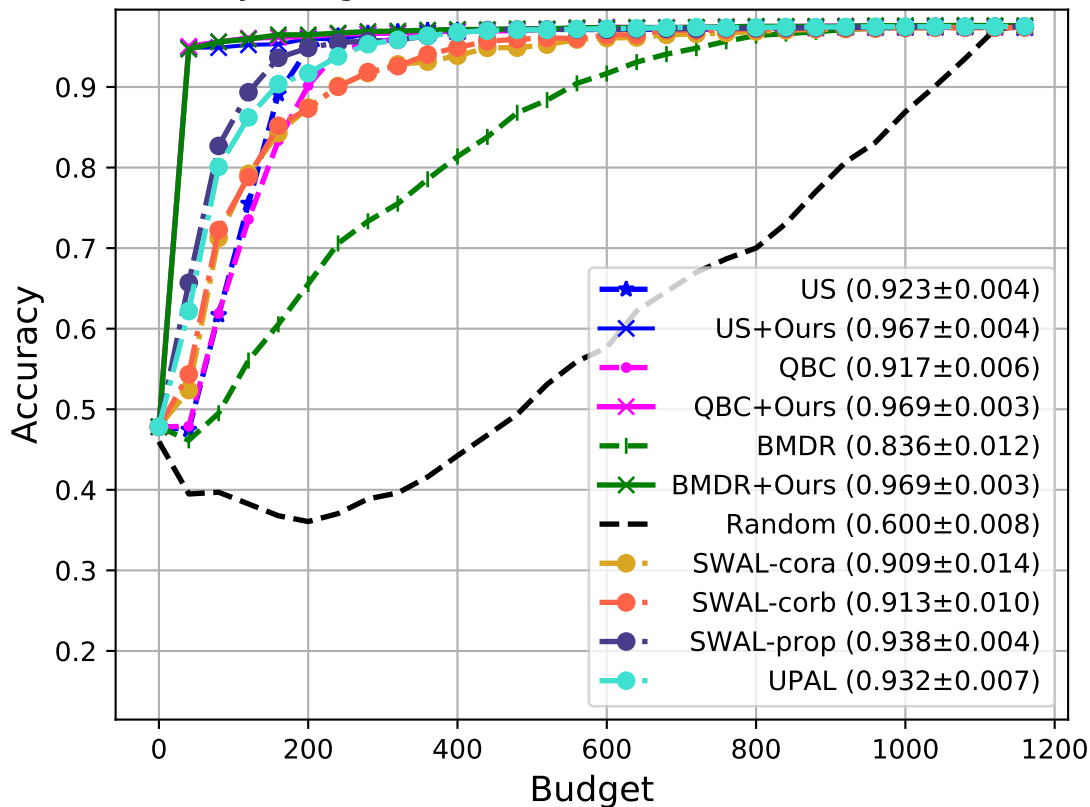

Supplement: supplementary_material [file attachment]

Accuracy-budget Curve of Tic-tac-toe Dataset with batch size

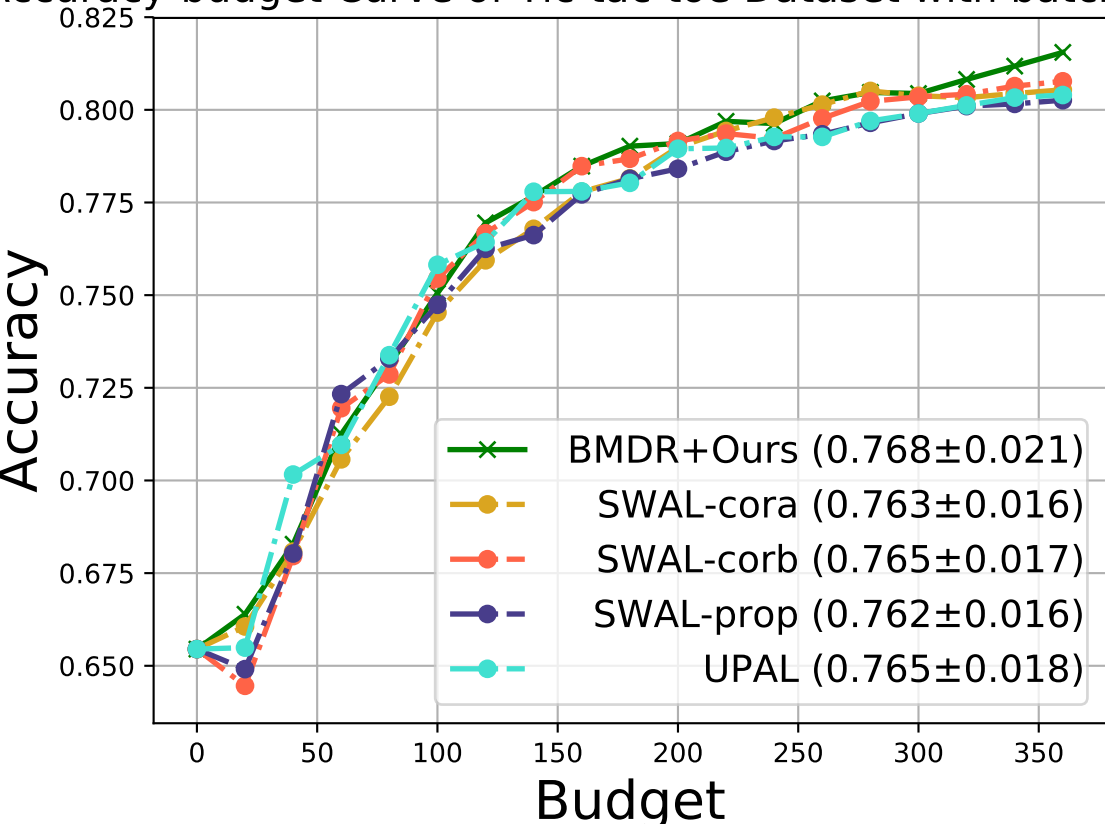

Supplement: supplementary_material [file attachment]

# AUC-budget Curve of Vehicle Dataset with batch size 10

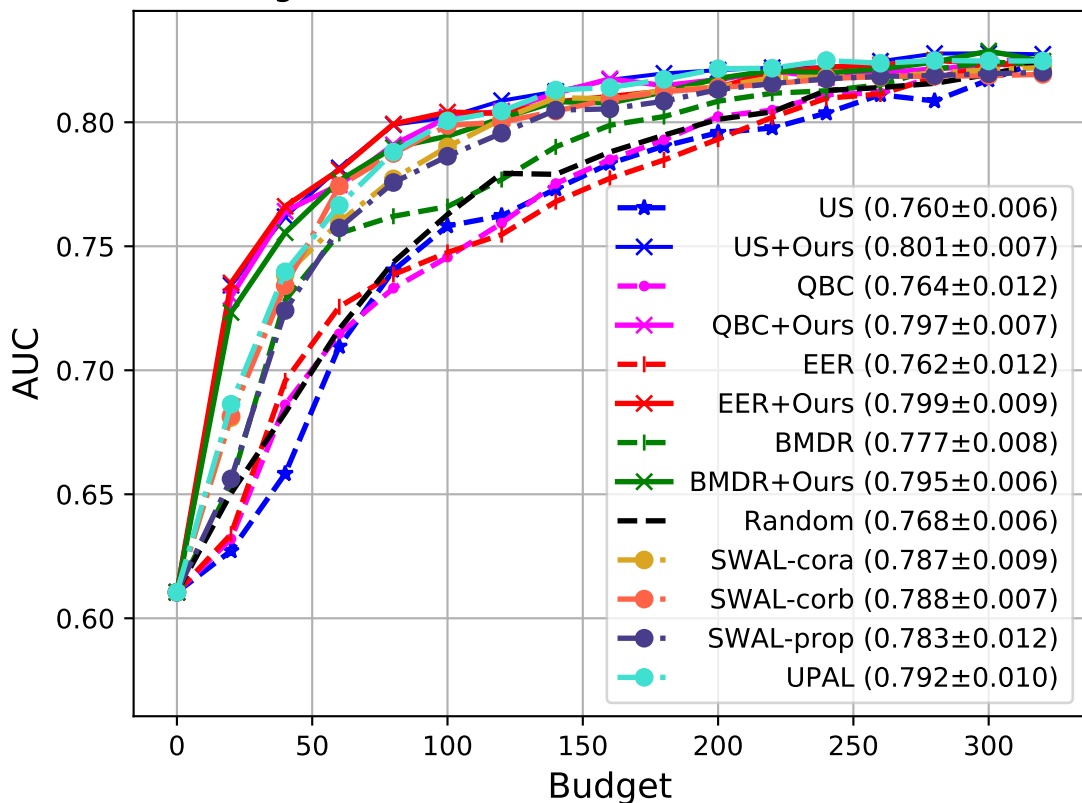

Supplement: supplementary_material [file attachment]

### F1-budget Curve of Gcloudub Dataset with batch size 10

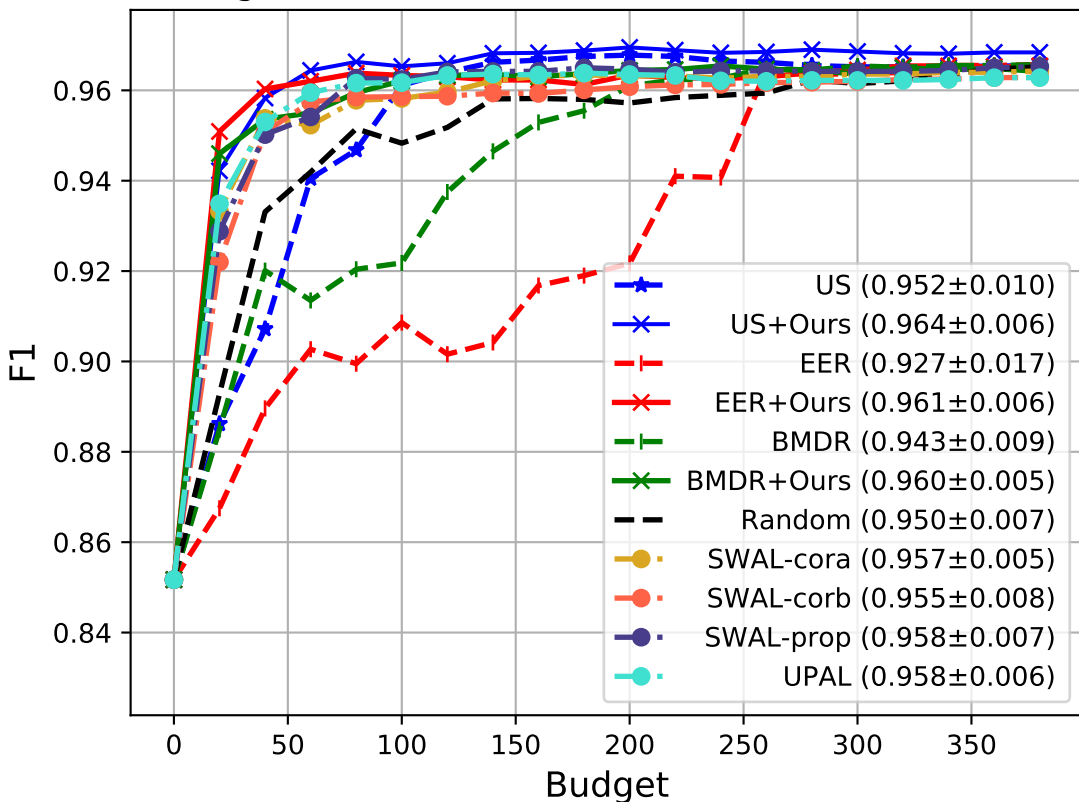

Supplement: supplementary_material [file attachment]

F1-budget Curve of Tic-tac-toe Dataset with batch size 1

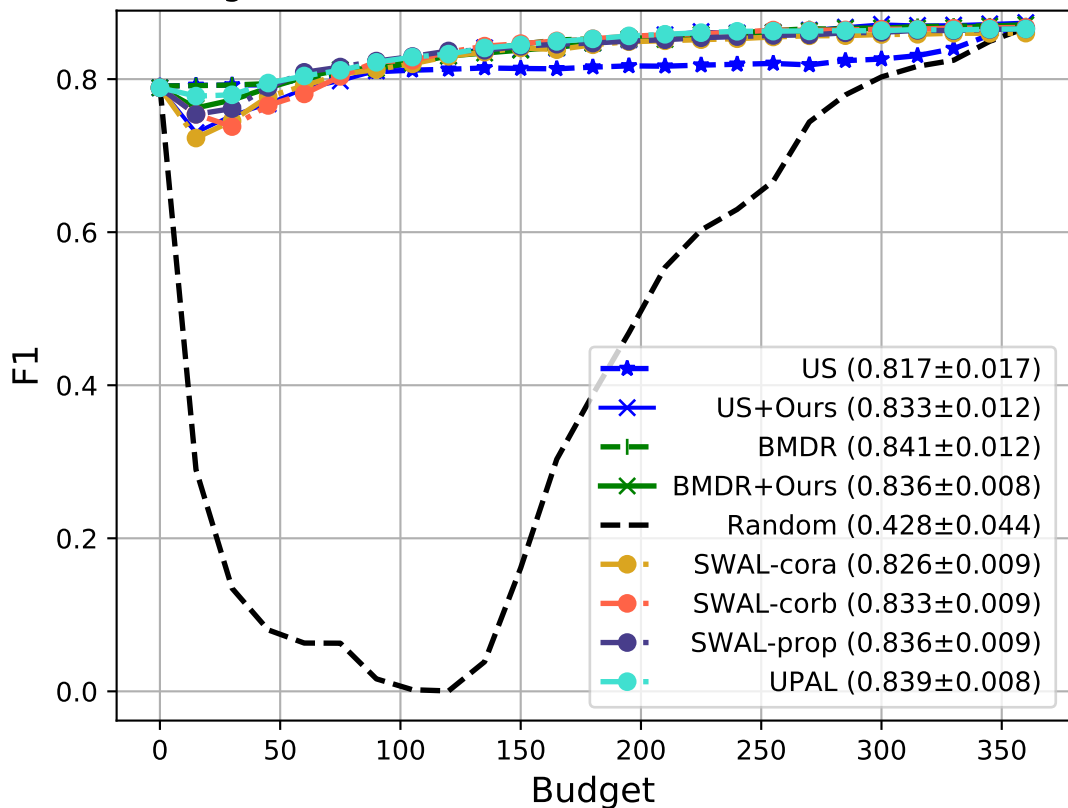

Supplement: supplementary_material [file attachment]

Accuracy-budget Curve of D31 Dataset with batch size 1

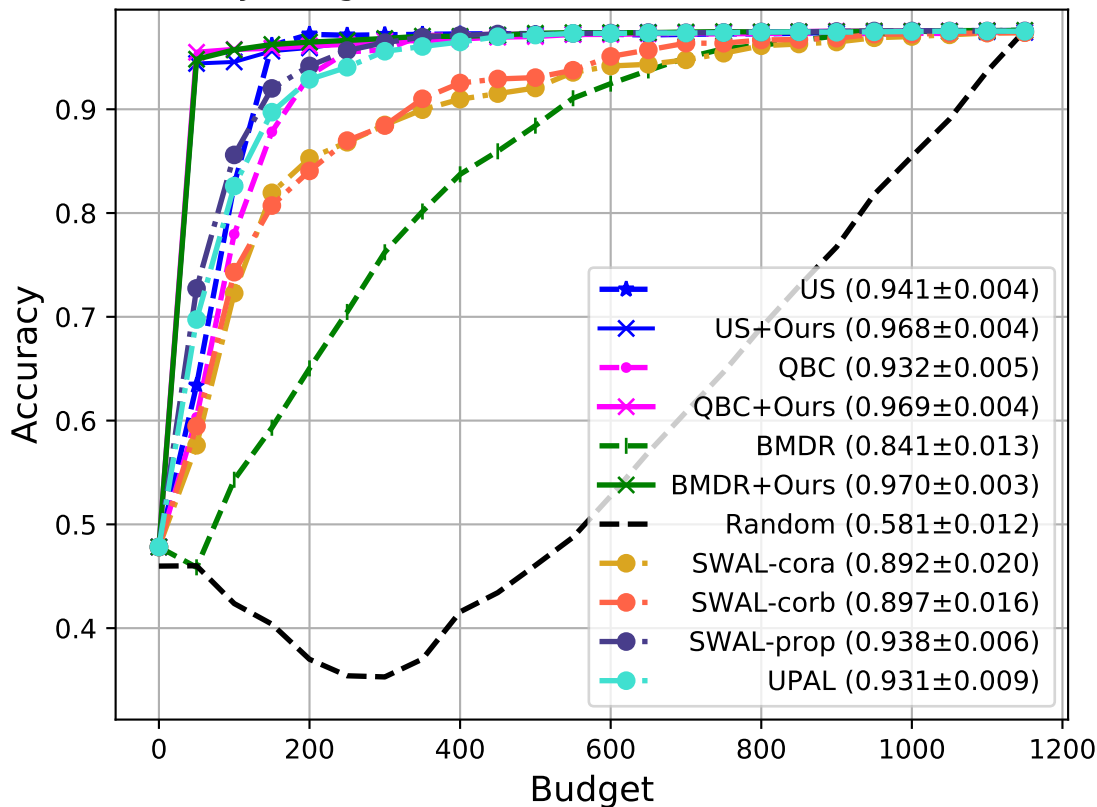

Supplement: supplementary_material [file attachment]

F1-budget Curve of Ex8a Dataset with batch size 20

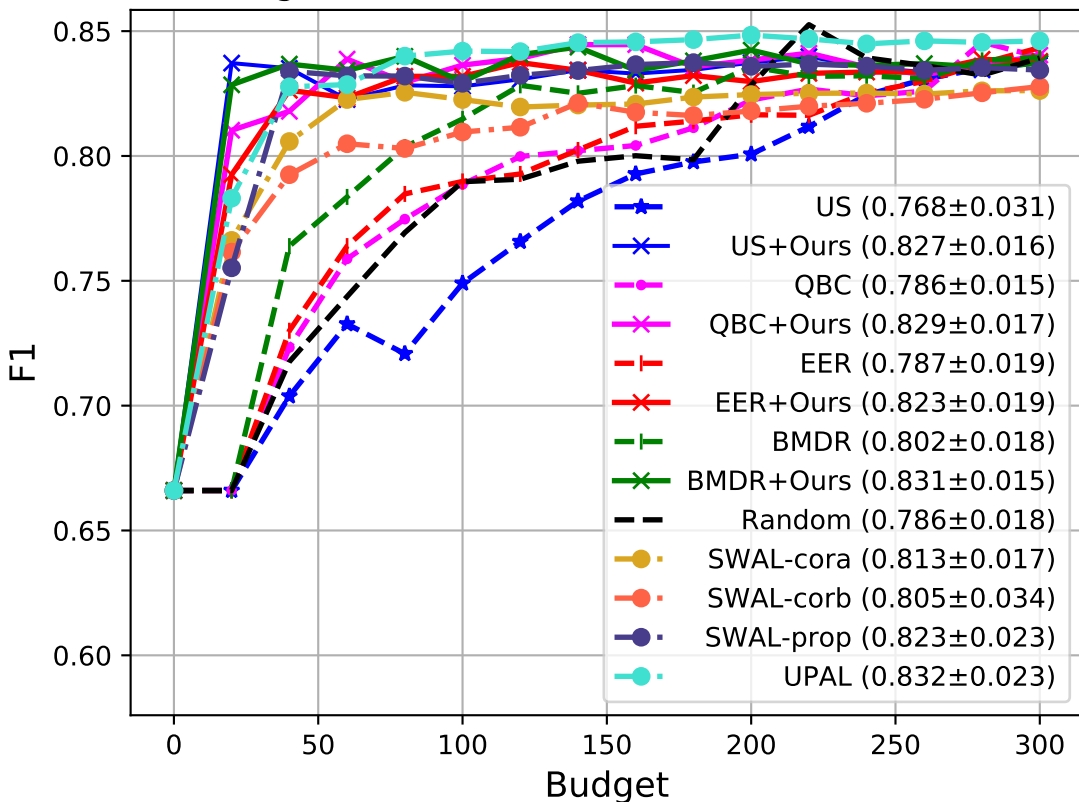

Supplement: supplementary_material [file attachment]

Accuracy-budget Curve of Ex8b Dataset with batch size 10

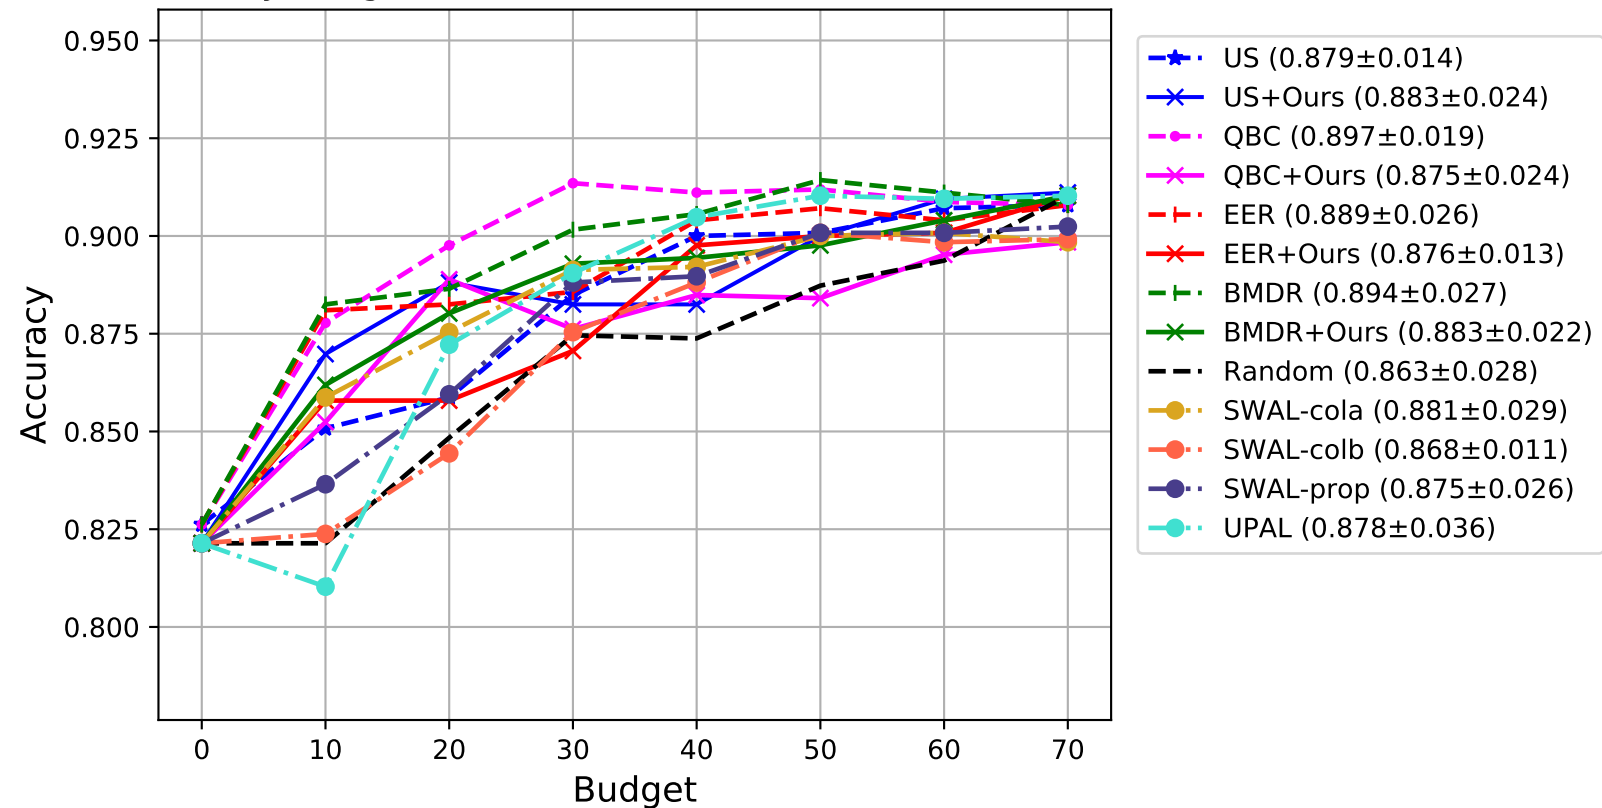

Supplement: supplementary_material [file attachment]
